# Supplementary material
Source: ML conference proceedings conference paper supplement (https://openaccess.thecvf.com/content/ICCV_2017/html/Poggi_Quantitative_Evaluation_of_ICCV_2017_paper.html)
Supplement: Supplementary file 1 [file Poggi_Quantitative_Evaluation_of_ICCV_2017_supplemental.pdf]

# Supplementary material

## Quantitative evaluation of confidence measures in a machine learning world

Matteo Poggi, Fabio Tosi, Stefano Mattoccia  
University of Bologna  
Department of Computer Science and Engineering (DISI)  
Viale del Risorgimento 2, Bologna, Italy  
{matteo.poggi8, fabio.tosi5, stefano.mattoccia}@unibo.it

This document provides additional details for paper *Quantitative evaluation of confidence measures in a machine learning world*. Single column format has been chosen to improve readability and to allow large tables to be fully displayed. Section 1 describes in detail all the confidence measures, their formulation and parameters. Section 2 reports execution time for, respectively, standalone and machine learning based measures.

### 1 Confidence Measures

We report a detailed description for each reviewed confidence measure. As shown in Figure 1, given a pixel  $\mathbf{p} = (x, y)$ , we will refer to its the minimum cost as  $c_1(\mathbf{p})$ , the second minimum as  $c_2(\mathbf{p})$  and the second local minimum as  $c_{2m}(\mathbf{p})$ . We refer to a matching cost for any disparity hypothesis  $d$  as  $c_d(\mathbf{p})$ . The disparity hypothesis corresponding to  $c_1(\mathbf{p})$  will be referred to as  $d_1(\mathbf{p})$ , the one to  $c_2(\mathbf{p})$  as  $d_2(\mathbf{p})$  and so on. If not specified, costs and disparities refer to left image pixels (L). When talking about right image (R), we introduce the <sup>R</sup> notations on both costs (e.g.,  $c_1^R(\mathbf{p})$ ) and disparities. We denote as  $\mathbf{p}' = (x', y')$  the matching pixel for  $\mathbf{p}$  according to  $d_1$  (i.e.,  $x' = x - d_1(\mathbf{p})$ ,  $y' = y$ ). Finally, we denote with <sup>LL</sup> matching costs and disparities related to self-matching stereo on the left image (i.e., using the left image as reference and target).

#### 1.1 Minimum cost and local properties of the cost curve

These methods analyze local properties of the cost curve encoded by  $c_1$ ,  $c_2$  and  $c_{2m}$ .

- **MSM** (Matching Score Measure), reviewed in [1]

$$MSM(\mathbf{p}) = -c_1(\mathbf{p}) \quad (1)$$

- **MM** (Maximum Margin)

$$MM(\mathbf{p}) = c_{2m}(\mathbf{p}) - c_1(\mathbf{p}) \quad (2)$$

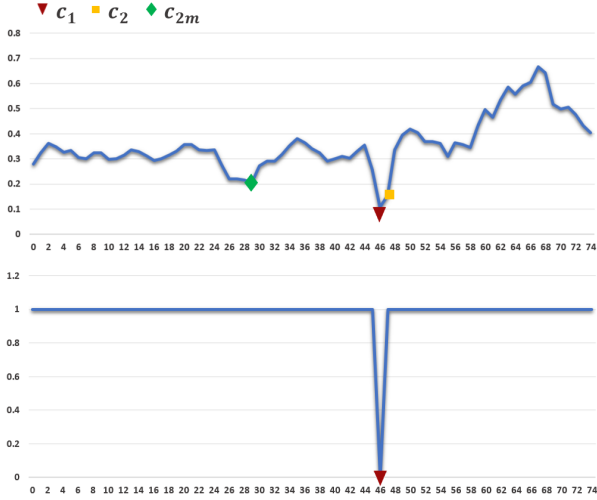

Fig. 1: Examples of ambiguous cost curve (top) and ideal one (bottom). We highlight on the ambiguous curve the minimum cost  $c_1$ , the second minimum  $c_2$  and the second local minimum  $c_{2m}$ .

- **MMN** (Maximum Margin Naive), reviewed in [1]

$$MMN(\mathbf{p}) = c_2(\mathbf{p}) - c_1(\mathbf{p}) \quad (3)$$

- **NLM** (Non Linear Margin), [2]

$$NLM(\mathbf{p}) = e^{-\frac{c_{2m}(\mathbf{p}) - c_1(\mathbf{p})}{2\sigma_{NLM}^2}} \quad (4)$$

We set  $\sigma_{NLM}$  to 2.

- **NLMN** (Non Linear Margin Naive),

$$NLMN(\mathbf{p}) = e^{-\frac{c_2(\mathbf{p}) - c_1(\mathbf{p})}{2\sigma_{NLM}^2}} \quad (5)$$

- **CUR** (Curvature), reviewed in [1]

$$CUR(\mathbf{p}) = -2c_1(\mathbf{p}) + c_{d_1-1}(\mathbf{p}) + c_{d_1+1}(\mathbf{p}) \quad (6)$$

- **LC** (Local Curve), proposed in [3]

$$LC(\mathbf{p}) = \frac{\max(c_{d_1-1}(\mathbf{p}), c_{d_1+1}(\mathbf{p})) - c_1(\mathbf{p})}{\gamma} \quad (7)$$

As suggested in [3], we set  $\gamma$  to 480.

– **PKR** (Peak Ratio), reviewed in [1]

$$PKR(\mathbf{p}) = \frac{c_{2m}(\mathbf{p})}{c_1(\mathbf{p})} \quad (8)$$

– **PKRN** (Peak Ratio Naive), reviewed in [1]

$$PKRN(\mathbf{p}) = \frac{c_2(\mathbf{p})}{c_1(\mathbf{p})} \quad (9)$$

– **APKR** (Average Peak Ratio), proposed in [4]

$$APKR(\mathbf{p}) = \frac{1}{|N_{\mathbf{p}}|} \sum_{\mathbf{q} \in N_{\mathbf{p}}} \frac{c_{2m}(\mathbf{q}, d_{2m}(\mathbf{p}))}{c_1(\mathbf{q}, d_1(\mathbf{p}))} \quad (10)$$

being  $N_{\mathbf{p}}$  a local patch centered on  $\mathbf{p}$ .

– **APKRN** (Average Peak Ratio Naive)

$$APKRN(\mathbf{p}) = \frac{1}{|N_{\mathbf{p}}|} \sum_{\mathbf{q} \in N_{\mathbf{p}}} \frac{c_2(\mathbf{q}, d_2(\mathbf{p}))}{c_1(\mathbf{q}, d_1(\mathbf{p}))} \quad (11)$$

– **WPKR** (Weighted Peak Ratio), proposed in [5]

$$WPKR(\mathbf{p}) = \frac{1}{|N_{\mathbf{p}}|} \sum_{\mathbf{q} \in N_{\mathbf{p}}} \alpha(\mathbf{p}, \mathbf{q}) \frac{c_{2m}(\mathbf{q}, d_{2m}(\mathbf{p}))}{c_1(\mathbf{q}, d_1(\mathbf{p}))} \quad (12)$$

with

$$\alpha(\mathbf{p}, \mathbf{q}) = \begin{cases} 1, & |I(\mathbf{p}) - I(\mathbf{q})| < \textit{threshold} \\ 0, & \textit{otherwise} \end{cases} \quad (13)$$

We set a threshold value of intensity of 60 to compute the binary weights.

– **WPKRN** (Average Peak Ratio Naive)

$$WPKRN(\mathbf{p}) = \frac{1}{|N_{\mathbf{p}}|} \sum_{\mathbf{q} \in N_{\mathbf{p}}} \alpha(\mathbf{p}, \mathbf{q}) \frac{c_2(\mathbf{q}, d_2(\mathbf{p}))}{c_1(\mathbf{q}, d_1(\mathbf{p}))} \quad (14)$$

with

$$\alpha(\mathbf{p}, \mathbf{q}) = \begin{cases} 1, & |I(\mathbf{p}) - I(\mathbf{q})| < \textit{threshold} \\ 0, & \textit{otherwise} \end{cases} \quad (15)$$

We set a threshold value of intensity of 60 to compute the binary weights.

– **DAM** (Disparity Ambiguity Measure), proposed in [6]

$$DAM(\mathbf{p}) = |d_1(\mathbf{p}) - d_2(\mathbf{p})| \quad (16)$$

- **SGE** (Semi-Global Energy), proposed in [6]

$$SGE(\mathbf{p}) = \sum_r \sum_{\mathbf{q} \in r(\mathbf{p})} c_1(\mathbf{q}) + P_1 T(|d_1(\mathbf{q}) - d_1(N(\mathbf{q}))| = 1) + P_2 T(|d_1(\mathbf{q}) - d_1(N(\mathbf{q}))| > 1) \quad (17)$$

We set P1 and P2 penalties to, respectively, 0.2 and 0.5 being matching costs normalized.

## 1.2 Analysis of the entire cost curve

Differently from previous confidence measures, those belonging to this category analyze for each point the overall distribution of matching costs.

- **PER** (Perturbation), proposed in [6]

$$PER(\mathbf{p}) = \sum_{d \neq d_1} e^{-\frac{(c_1(\mathbf{p}) - c_d(\mathbf{p}))^2}{s^2}} \quad (18)$$

We set  $s$  to 120.

- **MLM** (Maximum Likelihood Measure), proposed in [7] and reviewed in [1]

$$MLM(\mathbf{p}) = \frac{e^{-\frac{c_1(\mathbf{p})}{2\sigma_{MLM}^2}}}{\sum_d e^{-\frac{c_d(\mathbf{p})}{2\sigma_{MLM}^2}}} \quad (19)$$

We set  $\sigma_{MLM}$  to 2.

- **AML** (Attainable Likelihood Measure), proposed in [7] and reviewed in [1]

$$AML(\mathbf{p}) = \frac{1}{\sum_d e^{-\frac{c_d(\mathbf{p})}{2\sigma_{AML}^2}}} \quad (20)$$

We set  $\sigma_{AML}$  to 2.

- **NOI** (Number Of Inflections), reviewed in [1]

$$NOI(\mathbf{p}) = |M|$$

$$M = \{d_i : c_{d_{i-1}}(\mathbf{p}) > c_{d_i}(\mathbf{p}) \wedge c_{d_i}(\mathbf{p}) < c_{d_{i+1}}(\mathbf{p})\} \quad (21)$$

- **LMN** (Local Minima in Neighborhood), proposed in [4]

$$LMN(\mathbf{p}) = \sum_{\mathbf{q} \in N_{\mathbf{p}}} LM(\mathbf{q}) \quad (22)$$

with

$$LM(\mathbf{q}) = \begin{cases} 1, & c_{d_1(\mathbf{p})}(\mathbf{q}) \text{ is a local minima} \\ 0, & \text{otherwise} \end{cases} \quad (23)$$

We set  $\sigma_{MLM}$  to 2.

- **WMN** (Winner Margin), reviewed in [1]

$$WMN(\mathbf{p}) = \frac{c_{2m}(\mathbf{p}) - c_1(\mathbf{p})}{\sum_d c_d(\mathbf{p})} \quad (24)$$

- **WMNN** (Winner Margin Naive), reviewed in [1]

$$WMNN(\mathbf{p}) = \frac{c_2(\mathbf{p}) - c_1(\mathbf{p})}{\sum_d c_d(\mathbf{p})} \quad (25)$$

- **NEM** (Negative Entropy Measure), reviewed in [1]

$$NEM(\mathbf{p}) = - \sum_d p(d) \log p(d)$$

$$p(d) = \frac{e^{-c_1(\mathbf{p})}}{\sum_d e^{-c_d(\mathbf{p})}} \quad (26)$$

### 1.3 Left and right consistency

This category evaluates the consistency between corresponding points according to two different cues: one, symmetric, based on left and right maps and one, asymmetric, based only on the left map.

- **LRC** (Left-Right Consistency), reviewed in [1]

$$LRC(\mathbf{p}) = -|d_1(\mathbf{p}) - d^R(\mathbf{p}')| \quad (27)$$

- **LRD** (Left-Right Difference), reviewed in [1]

$$LRD(\mathbf{p}) = \frac{c_2(\mathbf{p}) - c_1(\mathbf{p})}{|c_1(\mathbf{p}) - \min_d c_d^R(\mathbf{p}')|} \quad (28)$$

- **ZSAD** (Zero-Mean Sum of Absolute Differences), proposed in [6]

$$ZSAD(\mathbf{p}) = \sum_{\mathbf{q} \in N_{\mathbf{p}}} |I^L(\mathbf{q}) - \mu(I^L(\mathbf{p})) - I^R(\mathbf{q}') + \mu(I^R(\mathbf{p}'))| \quad (29)$$

- **ACC** (Asymmetric Consistency Check), proposed in [8]

$$ACC(\mathbf{p}) = \begin{cases} 0, & \text{if } d_1(\mathbf{p}) \in Q \text{ and } \theta \\ 1, & \text{otherwise} \end{cases} \quad (30)$$

being  $Q$  the set of pixels matching the same pixel on the right image and  $\theta$  the following condition:

$$d_1(\mathbf{p}) \neq \max_{\mathbf{p} \in Q} d_1(\mathbf{p}) \text{ or } c_1(\mathbf{p}) \neq \min_{\mathbf{p} \in Q} c_1(\mathbf{p})$$

- **UC** (Uniqueness Constraint), proposed in [9]

$$UC(\mathbf{p}) = \begin{cases} 0, & \text{if } d_1(\mathbf{p}) \neq d_1^R(\mathbf{p} - d_1(\mathbf{p})) \text{ and } c_1 \neq \min_{\mathbf{q} \in Q} c_1(\mathbf{q}) \\ 1, & \text{otherwise} \end{cases} \quad (31)$$

- **UCC** (Uniqueness Constraint Cost),

$$UCC(\mathbf{p}) = \begin{cases} 0, & \text{if } d_1(\mathbf{p}) \neq d_1^R(\mathbf{p} - d_1(\mathbf{p})) \text{ and } c_1 \neq \min_{\mathbf{q} \in Q} c_1(\mathbf{q}) \\ -c_1(\mathbf{p}), & \text{otherwise} \end{cases} \quad (32)$$

- **UCO** (Uniqueness Constraint Occurrences),

$$UCO(\mathbf{p}) = -|Q| \quad (33)$$

#### 1.4 Disparity map features

Confidence measures belonging to this group are obtained by extracting features from the reference disparity map.

- **DTD** (Distance to Discontinuities), proposed in [10]

$$DTD(\mathbf{p}) = \min_{\mathbf{q} \in D} \|\mathbf{p} - \mathbf{q}\| \quad (34)$$

- **DMV** (Disparity Map Variance), proposed in [6]

$$DMV(\mathbf{p}) = \|\nabla d_1(\mathbf{p})\| \quad (35)$$

- **VAR** (Variance of disparity), proposed in [6]

$$VAR(\mathbf{p}) = \frac{1}{N} \sum_{\mathbf{q} \in N_{\mathbf{p}}} (d_1(\mathbf{q}) - \mu_r(d_1(\mathbf{p})))^2 \quad (36)$$

with

$$\mu_r(\mathbf{p}) = \frac{1}{N} \sum_{\mathbf{q} \in N_{\mathbf{p}}} d_1(\mathbf{q}) \quad (37)$$

- **DA** (Disparity Agreement), proposed in [11]

$$DA(\mathbf{p}) = H_{N_{\mathbf{p}}}(d_1(\mathbf{p})) \quad (38)$$

with  $H_{N_{\mathbf{p}}}$  histogram of interval  $[d_{min}, d_{max}]$  computed on image patch  $N_{\mathbf{p}}$ .  $H_{N_{\mathbf{p}}}(D_1(\mathbf{p}))$  encodes the number of pixels in  $N_{\mathbf{p}}$  sharing the same disparity value with  $\mathbf{p}$ .

- **MDD** (Median Deviation of Disparity), proposed in [10]

$$MDD(\mathbf{p}) = -|D_1(\mathbf{p}) - MED_{N_{\mathbf{p}}}(D_1(\mathbf{p}))| \quad (39)$$

where  $MED_{N_{\mathbf{p}}}$  indicates the median value of a patch  $N_{\mathbf{p}}$  centered on  $\mathbf{p}$ .

- **DS** (Disparity Scattering), proposed in [11]

$$DS(\mathbf{p}) = -\log \frac{\sum_d 1 - \delta(H_{N_{\mathbf{p}}}(d, 0))}{|N_{\mathbf{p}}|} \quad (40)$$

being  $|N_{\mathbf{p}}|$  number of pixels in  $N_{\mathbf{p}}$  and  $\delta$  a Kronecker delta:

$$\delta(H_{N_{\mathbf{p}}}(d, 0)) = \begin{cases} 1, & \text{if } H_{N_{\mathbf{p}}}(d) = 0 \\ 0, & \text{otherwise} \end{cases} \quad (41)$$

## 1.5 Reference image features

Confidence measures belonging to this category use as input domain only the reference image.

- **DB** (Distance to Border), proposed in [10]

$$DB(\mathbf{p}) = \min(x, y, W - x, H - y) \quad (42)$$

- **DLB** (Distance to Left Border), proposed in [12]

$$DLB(\mathbf{p}) = \min(x, d_{max}) \quad (43)$$

- **HGM** (Horizontal Gradient Magnitude), proposed in [6]

$$HGM(\mathbf{p}) = \|\nabla_x I^L(\mathbf{p})\| \quad (44)$$

- **DTE** (Distance to Edge)

$$DTE(\mathbf{p}) = \min_{\mathbf{q} \in E} \|\mathbf{p} - \mathbf{q}\| \quad (45)$$

being  $E$  the set of edge pixels.

## 1.6 Image distinctiveness

The idea behind these confidence measures is to exploit the notion of distinctiveness of the examined point within its neighborhoods along the horizontal scanline of the same image.

- **DTS** (Distinctiveness), proposed in [13] and reviewed in [1]

$$DTS^L(\mathbf{p}) = \min_{d \in d_s, d \neq 0} c_d^{LL}(\mathbf{p}) \quad (46)$$

with

$$d_{min} - d_{max} \leq d_s \leq d_{max} - d_{min} \quad (47)$$

- **DSM** (Distinctive Similarity Measure), proposed in [14] and reviewed in [1]

$$DSM(\mathbf{p}) = \frac{DTS^L(\mathbf{p}) \times DTS^R(\mathbf{p}')}{c_1(\mathbf{p})^2} \quad (48)$$

- **SAMM** (Self-Aware Matching Measure), proposed in [15] and reviewed in [1]

$$SAMM(\mathbf{p}) = \frac{\sum_d (c_{d-d_1}(\mathbf{p}) - \mu)(c_d^{LL}(\mathbf{p}) - \mu^{LL})}{\sigma^{LL}\sigma} \quad (49)$$

being  $\mu$  and  $\sigma$ , respectively, average and standard deviation of costs.

## 1.7 Learning-based approaches

### Random forest approaches

- **ENS** (Ensemble), proposed in [6]

$$f_{23} = (PKR^1, PKR^2, PKR^3, NEM^1, NEM^2, NEM^3, PER^1, PER^2, PER^3, LRC^1, HGM^1, HGM^2, HGM^3, DMV^1, DMV^2, DMV^3, DAM^1, DAM^2, DAM^3, ZSAD^1, ZSAD^2, ZSAD^3, SGE^1) \quad (50)$$

being features marked with superscript <sup>1</sup> computed at full resolution, with superscript <sup>2</sup> at half resolution and with superscript <sup>3</sup> at quarter resolution.

- **GCP** (Ground Control Points), proposed in [10]

$$f_8 = (MSM, DB, MMN, AML, LRC, LRD, DD, MDD) \quad (51)$$

- **LEV** (Leveraging-Stereo), proposed in [12]

$$f_{22} = (PKR, PKRN, MSM, MM, WMN, MLM, PER, NEM, LRD, LC, VAR^1, VAR^2, VAR^3, VAR^4, DD, MDD^1, MDD^2, MDD^3, MDD^4, LRC, HGM, DLB) \quad (52)$$

being features marked with superscripts <sup>1,2,3,4</sup> computed, respectively, on image patches of size  $5 \times 5$ ,  $7 \times 7$ ,  $9 \times 9$  and  $11 \times 11$ .



- **O1** (O1), proposed in [11]

$$f_{20} = (DA^1, DA^2, DA^3, DA^4, DS^1, DS^2, DS^3, DS^4, MED^1, MED^2, MED^3, MED^4, VAR^1, VAR^2, VAR^3, VAR^4, MDD^1, MDD^2, MDD^3, MDD^4) \quad (53)$$

being features marked with superscripts <sup>1,2,3,4</sup> computed, respectively, on image patches of size  $5 \times 5$ ,  $7 \times 7$ ,  $9 \times 9$  and  $11 \times 11$ .

## CNN approaches

- **PBCP** (Patch Based Confidence Prediction), proposed in [16]

$$\begin{aligned} PBCP &= CNN(p_1, p_2) \\ p_1 &= [d_1(\mathbf{q}) - d_1(\mathbf{p})]_{\mathbf{q} \in W} \\ p_2 &= [d_1^{RL}(\mathbf{q}) - d_1(\mathbf{p})]_{\mathbf{q} \in W} \end{aligned} \quad (54)$$

being  $W$  a local patch centered on  $\mathbf{p}$  and  $d^{RL}$  the right disparity map reprojected into the left domain.

- **CCNN** (Confidence Convolutional Neural Network), proposed in [17]

$$\begin{aligned} CCNN &= CNN(d_1) \\ d_1 &= [d_1(\mathbf{q})]_{\mathbf{q} \in W} \end{aligned} \quad (55)$$

## 1.8 SGM-specific

- **PS** (Local-global relation), proposed in [18]

$$PS(\mathbf{p}) = \frac{c_2(\mathbf{p})^l - c_1(\mathbf{p})^l}{c_1(\mathbf{p})^l} \left(1 - \frac{\min\{|d_2^l - d_1^l|, \gamma\}}{\gamma}\right) \left(1 - \frac{\min\{|d_1^l - d_1^g|, \gamma\}}{\gamma}\right) \quad (56)$$

with superscript <sup>*l*</sup> referring to local costs/disparities (i.e., before SGM optimization) and with superscript <sup>*g*</sup> to global disparities (i.e., after SGM). We set  $\gamma$ , according to [18], to 10.

- **SCS** (Sum of Consistent Scanlines), proposed in [19]

$$SCS(\mathbf{p}) = |C(\mathbf{p})| \quad (57)$$

$$C = \{s_i \in S : s_i(\mathbf{p}) = d_1(\mathbf{p})\} \quad (58)$$

being  $S$  the set of scanlines deployed by SGM.

| Confidence Measure | Time (s) | Confidence Measure     | Time (s)  |
|--------------------|----------|------------------------|-----------|
| MSM                | 0.000893 | ACC                    | 0.004975  |
| MM                 | 0.001578 | UC                     | 0.005961  |
| MMN                | 0.001571 | UCC                    | 0.005968  |
| NLM                | 0.013377 | UCO                    | 0.005969  |
| NLMN               | 0.012779 | DTD                    | 0.009434  |
| CUR                | 0.002705 | DVM                    | 0.012755  |
| LC                 | 0.017225 | VAR (5 × 5)            | 0.002220  |
| PKR                | 0.002705 | VAR (7 × 7)            | 0.004345  |
| PKRN               | 0.002701 | VAR (9 × 9)            | 0.006379  |
| APKR (5 × 5)       | 0.172175 | VAR (11 × 11)          | 0.008415  |
| APKR (7 × 7)       | 0.315316 | DA (5 × 5)             | 0.322387  |
| APKR (9 × 9)       | 0.506297 | DA (7 × 7)             | 0.513795  |
| APKR (11 × 11)     | 0.742124 | DA (9 × 9)             | 0.685317  |
| APKRN (5 × 5)      | 0.165924 | DA (11 × 11)           | 0.868976  |
| APKRN (7 × 7)      | 0.314898 | MDD (5 × 5)            | 0.003329  |
| APKRN (9 × 9)      | 0.504986 | MDD (7 × 7)            | 0.015852  |
| APKRN (11 × 11)    | 0.740950 | MDD (9 × 9)            | 0.029476  |
| WPKR (5 × 5)       | 0.232535 | MDD (11 × 11)          | 0.045260  |
| WPKR (7 × 7)       | 0.442289 | DS (5 × 5)             | 0.392312  |
| WPKR (9 × 9)       | 0.728776 | DS (7 × 7)             | 0.513374  |
| WPKR (11 × 11)     | 1.054834 | DS (9 × 9)             | 0.685316  |
| WPKRN (5 × 5)      | 0.225042 | DS (11 × 11)           | 0.868976  |
| WPKRN (7 × 7)      | 0.414786 | DB                     | 0.003109  |
| WPKRN (9 × 9)      | 0.689999 | DLB                    | 0.004056  |
| WPKRN (11 × 11)    | 1.001287 | HGM                    | 0.003466  |
| DAM                | 0.001424 | DTE                    | 0.006493  |
| SGE                | 0.126254 | DTS                    | 0.984348  |
| PER                | 3.914982 | DSM                    | 1.987799  |
| MLM                | 3.699845 | SAMM                   | 4.042467  |
| AML                | 4.391692 | <i>Ens<sub>c</sub></i> | 32.563072 |
| NOI                | 0.000001 | <i>Ens<sub>r</sub></i> | 32.563072 |
| LMN                | 0.085781 | GCP                    | 5.468391  |
| WMN                | 0.002841 | LEV                    | 15.707940 |
| WMNN               | 0.002743 | O1                     | 3.534228  |
| NEM                | 9.529354 | PBCP*                  | 0.5       |
| LRC                | 0.003529 | CCNN*                  | 0.1       |
| LRD                | 0.004162 | PS                     | 0.084721  |
| ZSAD               | 0.016995 | SCS                    | 3.453257  |

Table 1: Execution time processing a stereo pair of the KITTI 2012 dataset with an Intel(R) Core(TM) i7-6700K CPU 4.00 GHz processor. For PBCP and CCNN execution time on a GPU (Nvidia Titan X).

## 2 Execution time

In this section we report execution time of our implementation in C++ of each confidence measure described in Section 1. Execution times, with an Intel(R) Core(TM) i7-6700K CPU 4.00 GHz processor, reported in Table 1 refer to the processing of a stereo pair of the KITTI 2012 dataset with all confidence measures excluding PBCP and CCNN. A preliminary extraction of input cues such as  $c_1, c_2, c_{2m}$ , local minima and disparity maps is executed with the aim to facilitate the computation. Such operation runs approximately in 2.2 seconds. Concerning [11] the execution time refers to an unoptimized implementations not based on O1 methodologies and thus not invariant to window size. Concerning PBCP and CCNN we report<sup>1</sup> the execution time provided in [16] and [17] with a Titan X GPU.

## References

1. Hu, X., Mordohai, P.: A quantitative evaluation of confidence measures for stereo vision. *IEEE Transactions on Pattern Analysis and Machine Intelligence (PAMI)* (2012) 2121–2133
2. Haeusler, R., Klette, R.: Evaluation of stereo confidence measures on synthetic and recorded image data. In: 2012 International Conference on Informatics, Electronics and Vision, ICIEV 2012. (2012) 963–968
3. Wedel, A., Meiner, A., Rabe, C., Franke, U., Cremers, D.: Detection and Segmentation of Independently Moving Objects from Dense Scene Flow. In: *Proceedings of the 7th International Conference on Energy Minimization Methods in Computer Vision and Pattern Recognition*, Bonn, Germany, Springer (August 2009) 14–27
4. Kim, S., g. Yoo, D., Kim, Y.H.: Stereo confidence metrics using the costs of surrounding pixels. In: 2014 19th International Conference on Digital Signal Processing. (Aug 2014) 98–103
5. Kim, S., Jang, C.Y., Kim, Y.H.: Weighted peak ratio for estimating stereo confidence level using color similarity. In: 2016 IEEE Asia Pacific Conference on Circuits and Systems (APCCAS). (Oct 2016) 196–197
6. Haeusler, R., Nair, R., Kondermann, D.: Ensemble learning for confidence measures in stereo vision. In: *CVPR. Proceedings.* (2013) 305–312 1.
7. Matthies, L.: Stereo vision for planetary rovers: Stochastic modeling to near real-time implementation. *Int. J. Comput. Vision* **8**(1) (jul 1992)
8. Min, D.B., Sohn, K.: An asymmetric post-processing for correspondence problem. *Sig. Proc.: Image Comm.* **25**(2) (2010) 130–142
9. Di Stefano, L., Marchionni, M., Mattoccia, S.: A fast area-based stereo matching algorithm. *Image and vision computing* **22**(12) (2004) 983–1005
10. Spyropoulos, A., Komodakis, N., Mordohai, P.: Learning to detect ground control points for improving the accuracy of stereo matching. In: *The IEEE Conference on Computer Vision and Pattern Recognition (CVPR), IEEE* (2014) 1621–1628
11. Poggi, M., Mattoccia, S.: Learning a general-purpose confidence measure based on  $o(1)$  features and asmarter aggregation strategy for semi global matching. In: *Proceedings of the 4th International Conference on 3D Vision, 3DV.* (2016)

---

<sup>1</sup> Superscript \* refers to the execution time reported in the original papers obtained with a Titan X GPU

12. Park, M.G., Yoon, K.J.: Leveraging stereo matching with learning-based confidence measures. In: The IEEE Conference on Computer Vision and Pattern Recognition (CVPR). (June 2015)
13. Manduchi, R., Tomasi, C.: Distinctiveness maps for image matching. In: Image Analysis and Processing, 1999. Proceedings. International Conference on, IEEE (1999) 26–31
14. Yoon, K.J., Kweon, I.S.: Distinctive similarity measure for stereo matching under point ambiguity. *Computer Vision and Image Understanding* **112**(2) (2008) 173–183
15. Mordohai, P.: The self-aware matching measure for stereo. In: The International Conference on Computer Vision (ICCV), IEEE (2009) 1841–1848
16. Seki, A., Pollefeys, M.: Patch based confidence prediction for dense disparity map. In: British Machine Vision Conference (BMVC). (2016)
17. Poggi, M., Mattoccia, S.: Learning from scratch a confidence measure. In: Proceedings of the 27th British Conference on Machine Vision, BMVC. (2016)
18. Marin, G., Zanuttigh, P., Mattoccia, S.: Reliable fusion of tof and stereo depth driven by confidence measures. In: Computer Vision - ECCV 2016 - 14th European Conference, Amsterdam, The Netherlands, October 11-14, 2016, Proceedings, Part VII. (2016) 386–401
19. Hirschmuller, H., Buder, M., Ernst, I.: Memory efficient semi-global matching. In: ISPRS Annals of the Photogrammetry, Remote Sensing and Spatial Information Sciences. (2012) 371–376
